# Supplementary material
Source: PubMed Central journal article supplement (PMC9680644)

**Figure S1.** The feature profiles of all soil water extracts varied primarily according due to incubation length when compared based on the peak area ( $n = 2,003$ ). In (A), the clustering of samples based on the t-SNE multi-dimension reduction algorithm separates along the first axis according to time. In (B), PERMANOVA results show incubation time was the primary factor explaining variation in the weighted Bray-Curtis dissimilarity among metabolite profiles. In (B), Samples from day 1 were removed due to the distorting effect of  $^{13}\text{C}$ -labeled amino acids (highlighted in panel A).

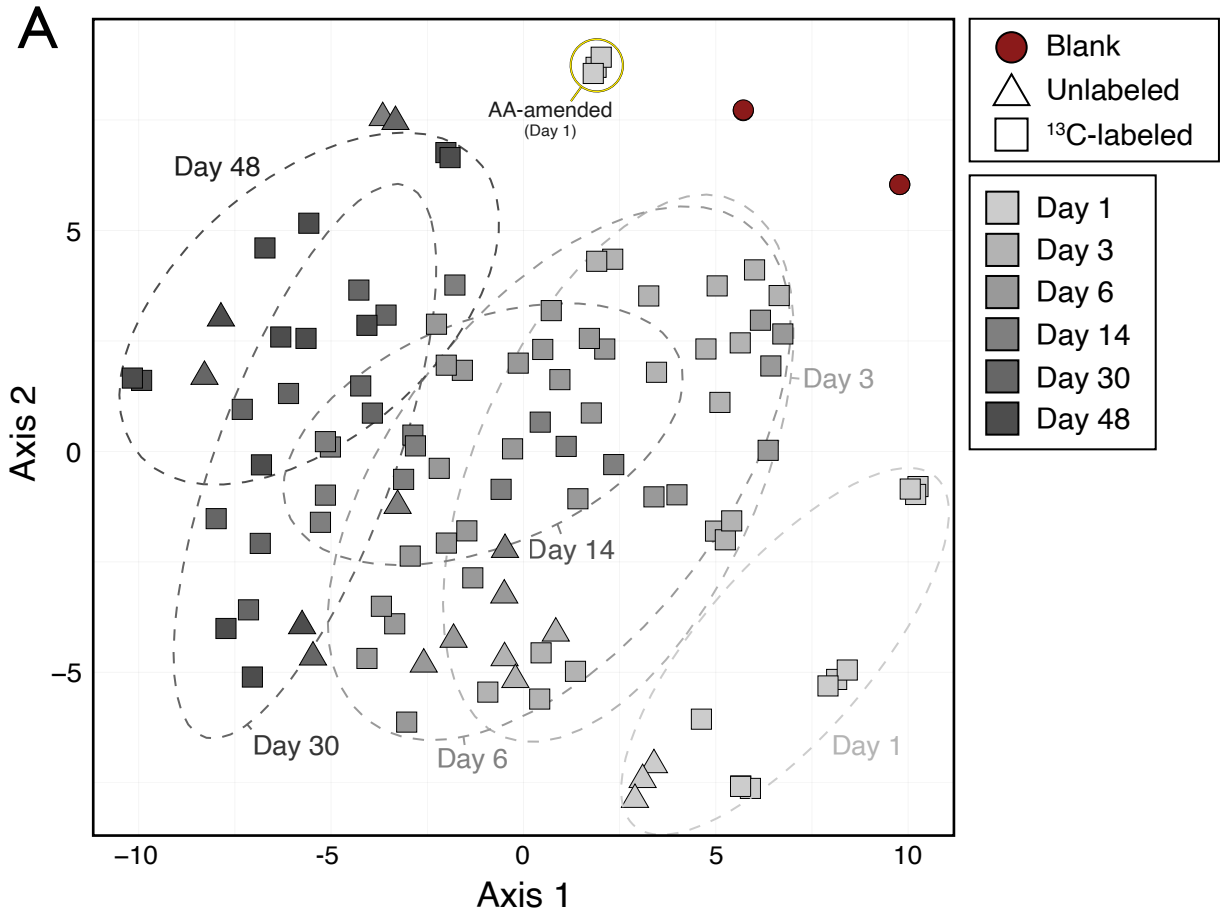

**B** PERMANOVA (Peak area)

|                 | df | $R^2$ | F    | $p$   |     |
|-----------------|----|-------|------|-------|-----|
| Time            | 4  | 0.401 | 15.4 | 0.001 | *** |
| Substrate       | 9  | 0.095 | 1.64 | 0.02  | *   |
| Time * substr.  | 21 | 0.139 | 1.02 | 0.47  |     |
| <i>residual</i> | 56 | 0.364 |      |       |     |
| <i>total</i>    | 90 | 1     |      |       |     |

**Figure S2.** An NMDS ordination showing the dissimilarity of bacterial communities which were  $^{13}\text{C}$ -labeled by soluble versus insoluble substrates. The differences in composition between populations metabolising glucose and cellulose are noteworthy, given the similarity in  $^{13}\text{C}$ -enriched metabolites shared (see Figure 2C). Bacterial community composition was determined from amplicon libraries targeting the 16S rRNA gene in the ‘heavy’ fractions of a DNA density gradient as described by Barnett *et al.*, 2022, from which the data was obtained. Each point corresponds to the composition of  $^{13}\text{C}$ -enriched populations at each sampling timepoint (see Table S1 for the sampling timepoints for each substrate). The primer pair (515F/806R) used here also amplify certain archaeal groups.

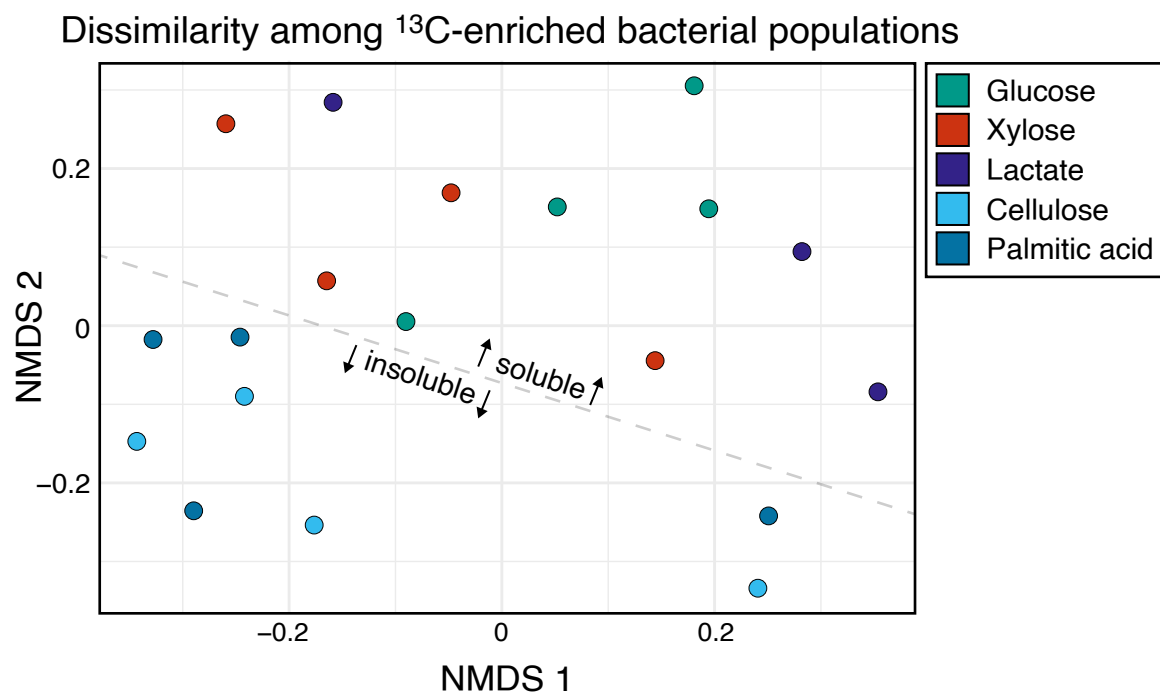

**Figure S3.** Patterns in the atom %  $^{13}\text{C}$  enrichment of benzoic and salicylic acid which were heavily enriched at the earliest timepoints in soils amended with amino acids and glucose.

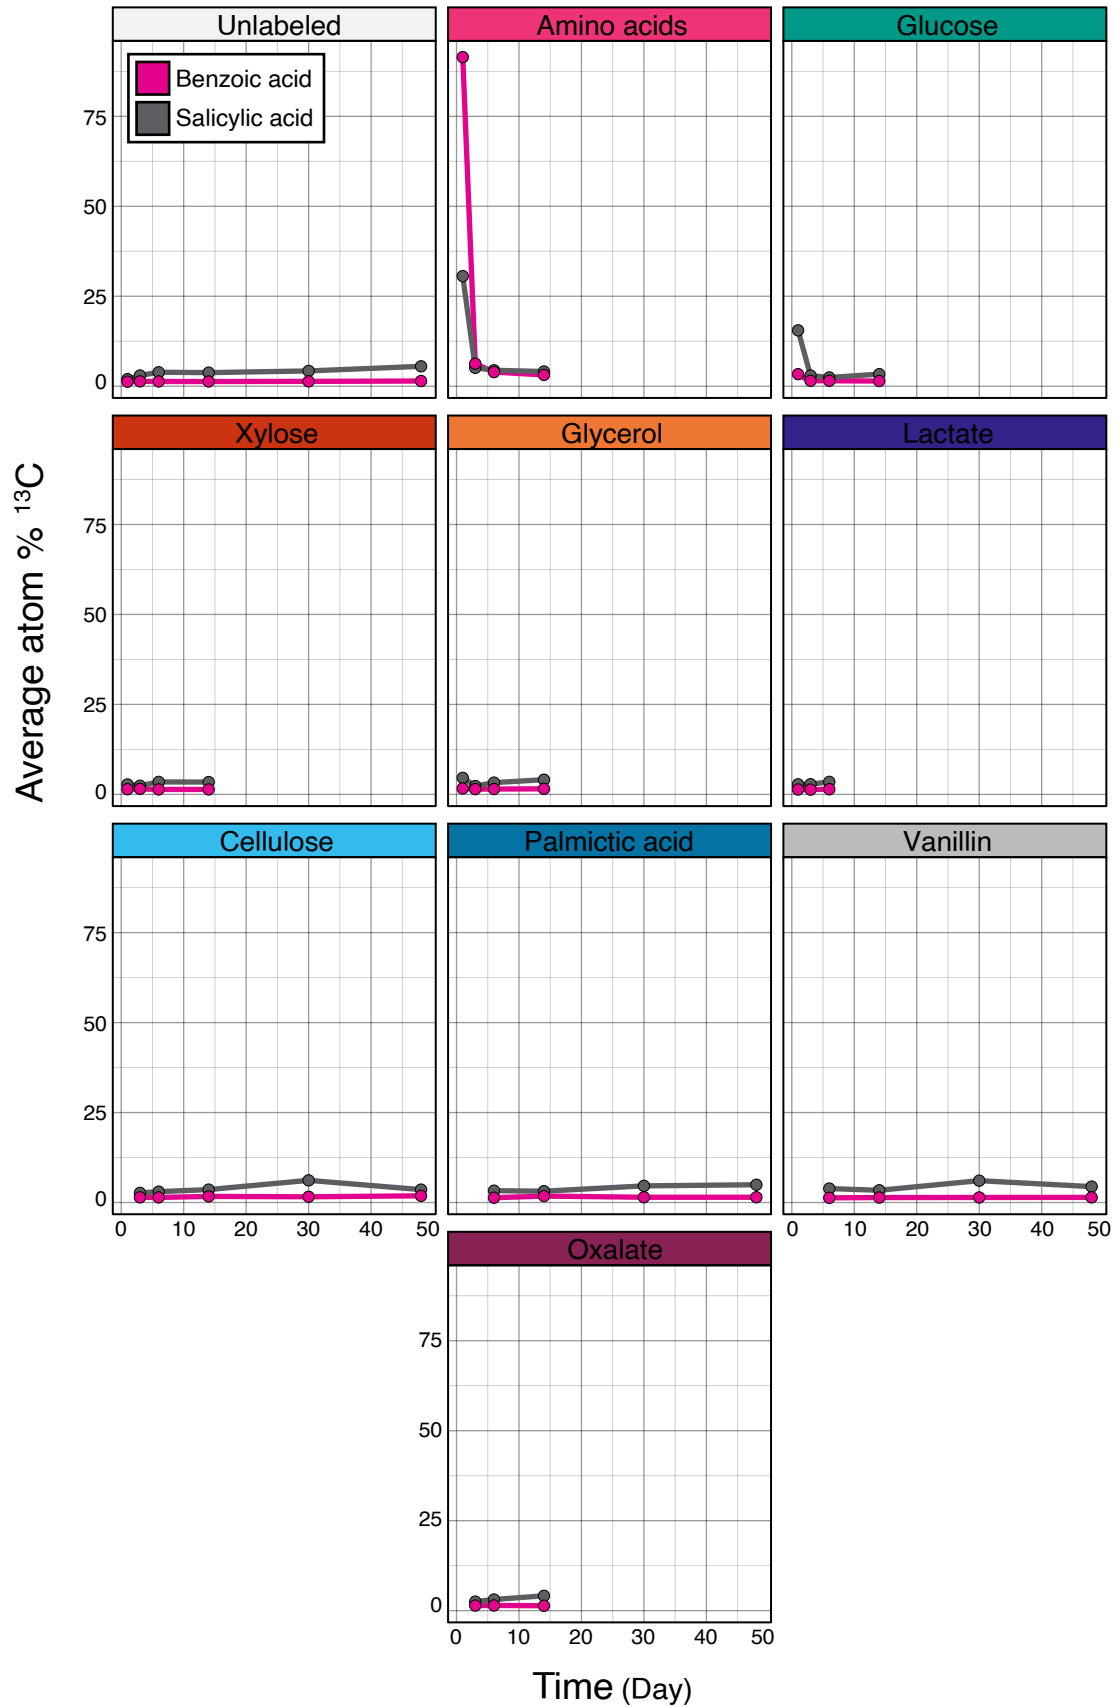

Supplement: aem.00839-22-s0001.pdf [file aem.00839-22-s0001.pdf]
